# Supplementary material for: In vitro screening of the impact of dietary prebiotic components, probiotic strains, and their symbiotic combinations on colonic microbiota in children with cystic fibrosis
Source: Royal Society of Chemistry journal article supplement (doi:10.1039/d4fo00325j), 2024-01-01

**Figure S1.** Beta Diversity (Bray-Curtis) of different treatments (prebiotics, probiotics and synbiotics).

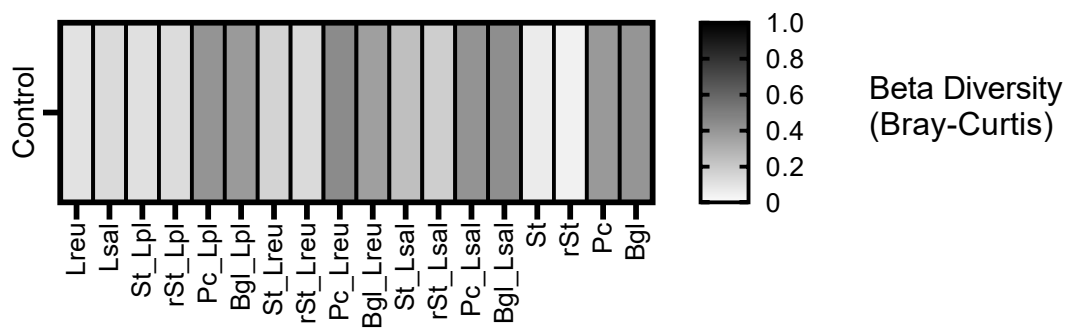

Supplement: d4fo00325j1.pdf [file d4fo00325j1.pdf]
