# Supplementary material for: In vitro screening of the impact of dietary prebiotic components, probiotic strains, and their symbiotic combinations on colonic microbiota in children with cystic fibrosis
Source: Royal Society of Chemistry journal article supplement (doi:10.1039/d4fo00325j), 2024-01-01
Supplement: d4fo00325j2.pdf [file d4fo00325j2.pdf]

**Table S1.** Metabolite production expressed as ammonia and lactate (Mean, SD (standard deviation), CV (coefficient of variation)).

| Metabolite | Treatment                                 | Mean<br>( $\mu\text{mol/L}$ ) | SD     | CV    |
|------------|-------------------------------------------|-------------------------------|--------|-------|
| Ammonia    | Control                                   | 3703.10                       | 84.74  | 2.29  |
|            | <i>L. rhamnosus</i>                       | 3429.86                       | 118.64 | 3.46  |
|            | <i>L. reuteri</i>                         | 3585.65                       | 454.21 | 12.67 |
|            | <i>L. salivarius</i>                      | 3556.89                       | 203.38 | 5.72  |
|            | Almidón                                   | 3101.49                       | 33.90  | 1.09  |
|            | Almidón resistente                        | 3053.56                       | 393.20 | 12.88 |
|            | Pectina                                   | 1826.38                       | 244.05 | 13.36 |
|            | B-glucano                                 | 1951.02                       | 386.42 | 19.81 |
|            | Almidón - <i>L. rhamnosus</i>             | 3856.49                       | 132.20 | 3.43  |
|            | Almidón resistente - <i>L. rhamnosus</i>  | 3906.83                       | 176.26 | 4.51  |
|            | Pectina - <i>L. rhamnosus</i>             | 2976.86                       | 40.68  | 1.37  |
|            | B-glucano - <i>L. rhamnosus</i>           | 3307.62                       | 311.85 | 9.43  |
|            | Almidón - <i>L. reuteri</i>               | 4239.98                       | 37.29  | 0.88  |
|            | Almidón resistente - <i>L. reuteri</i>    | 4364.62                       | 57.62  | 1.32  |
|            | Pectina - <i>L. reuteri</i>               | 3281.25                       | 233.88 | 7.13  |
|            | B-glucano - <i>L. reuteri</i>             | 3465.81                       | 67.79  | 1.96  |
|            | Almidón - <i>L. salivarius</i>            | 4467.68                       | 47.45  | 1.06  |
|            | Almidón resistente - <i>L. salivarius</i> | 4412.56                       | 84.74  | 1.92  |
|            | Pectina - <i>L. salivarius</i>            | 3647.97                       | 189.82 | 5.20  |
|            | B-glucano - <i>L. salivarius</i>          | 3863.68                       | 535.56 | 13.86 |
| Lactate    | Control                                   | 45.72                         | 2.29   | 5.01  |
|            | <i>L. rhamnosus</i>                       | 1694.07                       | 24.30  | 1.43  |
|            | <i>L. reuteri</i>                         | 69.71                         | 9.63   | 13.81 |
|            | <i>L. salivarius</i>                      | 1048.87                       | 64.65  | 6.16  |
|            | Almidón                                   | 55.77                         | 1.83   | 3.29  |
|            | Almidón resistente                        | 50.25                         | 5.04   | 10.04 |
|            | Pectina                                   | 80.41                         | 10.09  | 12.55 |
|            | B-glucano                                 | 149.79                        | 47.69  | 31.84 |
|            | Almidón - <i>L. rhamnosus</i>             | 1593.24                       | 45.85  | 2.88  |
|            | Almidón resistente - <i>L. rhamnosus</i>  | 1583.19                       | 374.61 | 23.66 |
|            | Pectina - <i>L. rhamnosus</i>             | 1189.99                       | 55.46  | 4.66  |
|            | B-glucano - <i>L. rhamnosus</i>           | 905.08                        | 9.93   | 1.10  |
|            | Almidón - <i>L. reuteri</i>               | 111.11                        | 13.35  | 12.02 |
|            | Almidón resistente - <i>L. reuteri</i>    | 252.71                        | 71.89  | 28.45 |
|            | Pectina - <i>L. reuteri</i>               | 99.00                         | 8.56   | 8.64  |
|            | B-glucano - <i>L. reuteri</i>             | 320.98                        | 17.80  | 5.55  |
|            | Almidón - <i>L. salivarius</i>            | 1352.65                       | 16.43  | 1.21  |
|            | Almidón resistente - <i>L. salivarius</i> | 1339.82                       | 35.26  | 2.63  |
|            | Pectina - <i>L. salivarius</i>            | 955.67                        | 76.68  | 8.02  |
|            | B-glucano - <i>L. salivarius</i>          | 1228.72                       | 171.16 | 13.93 |
