# Supplementary material for: In vitro screening of the impact of dietary prebiotic components, probiotic strains, and their symbiotic combinations on colonic microbiota in children with cystic fibrosis
Source: Royal Society of Chemistry journal article supplement (doi:10.1039/d4fo00325j), 2024-01-01
Supplement: d4fo00325j3.pdf [file d4fo00325j3.pdf]

**Table S2.** Interactions of each response variable (% of total variation and p-value)

| Response variable | Source of variation                       | % of total variation | p-value |
|-------------------|-------------------------------------------|----------------------|---------|
| Phylum            | Interaction                               | 60.36                | <0.0001 |
|                   | Phylum Factor                             | 38.80                | <0.0001 |
|                   | Treatment (pre, pro and synbiotic) Factor | 0.1276               | 0.9148  |
| Genus             | Interaction                               | 37.68                | <0.0001 |
|                   | Genus Factor                              | 60.46                | <0.0001 |
|                   | Treatment (pre, pro and synbiotic) Factor | 1.319                | <0.0001 |
